1 **Correlation between Mid-Upper Arm Circumference and Body Mass Index in**  
2 **the assessment of adults' nutritional status in Malawi.**

3 **Short title: Mid-Upper Arm Circumference and Body Mass Index in Malawi.**

4 **Authors**

5 Thokozani Mzumara<sup>1\*</sup>, Adriano Focus Lubanga<sup>2,3</sup>, Joseph Afonne<sup>4</sup>, George Munthali<sup>5</sup>, Byenala

6 Kaonga<sup>6</sup>, Gracian Harawa<sup>7</sup>, Akim Nelson Bwanali<sup>2,8</sup>

7 **Author Affiliations**

8 <sup>1</sup>Department of Ophthalmology, Mzuzu Urban Health Centre, Mzimba North District Health  
9 Office, Mbelwa District Council, Mzimba, Malawi

10 <sup>2</sup>Clinical Research Education and Management Services, Lilongwe, Malawi

11 <sup>3</sup> Department of Clinical Services, Kamuzu Central Hospital, Lilongwe, Malawi

12 <sup>4</sup>Faculty of Health Sciences, Mzuzu University, Mzuzu, Malawi

13 <sup>5</sup>Department of Finance, Mzuzu University, Mzuzu, Malawi

14 <sup>6</sup>Department of Clinical Services, Kamuzu Central Hospital, Lilongwe, Malawi.

15 <sup>7</sup>Department of Clinical Services, Mzuzu Central Hospital, Mzuzu, Malawi.

16 <sup>8</sup>Department of Clinical Services, Queen Elizabeth Central Hospital, Blantyre, Malawi.

17 **\*Corresponding Author:** Thokozani Mzumara, Mzuzu Urban Health Centre, P.O. Box 299,  
18 Mzuzu, Malawi

19 Phone: +265992376501

20 Email: [mzumarathokozani@gmail.com](mailto:mzumarathokozani@gmail.com)

21

## 22 **ABSTRACT**

### 23 **Background**

24 Body Mass Index (BMI) is a widely used and accepted indicator of nutritional status in adults.  
25 Mid-Upper-Arm-Circumference (MUAC) is another anthropometric measure used primarily  
26 among children. While BMI remains the best indicator of nutritional status, it can sometimes be  
27 impractical because of logistical requirements for weight and height measurement, especially for  
28 large population-based studies and bed-ridden patients. Therefore, we analyzed anthropometric  
29 data collected from the Malawi Epidemiology and Intervention Research Unit (MEIRU) Non-  
30 Communicable Disease (NCD) survey to determine the correlation between BMI and MUAC in  
31 the assessment of adult nutritional status in Malawi.

### 32 **Methods**

33 A secondary data analysis utilizing descriptive and correlational statistical research methods was  
34 used to determine the relationship between BMI and MUAC in the assessment of adults'  
35 nutritional status in Malawi. The data was analyzed using SPSS version 27. The independent t test  
36 and Chi-square were employed. Furthermore, the study included the Pearson correlation test to  
37 assess the relationship between variables. A p-value of  $<0.05$  was considered statistically  
38 significant.

## 39 **Results**

40 The study assessed 30,575 participants, of whom the majority (61.8%) were females. The mean  
41 MUAC was 27.2 (SD = 3.300), and the mean BMI was 23.5 (SD = 4.55). The study found a strong  
42 positive statistically significant correlation between MUAC and BMI among Malawians ( $r =$   
43  $0.836$ ,  $CI = (0.832-0.839)$  such that for each additional centimeter increase in MUAC, BMI is  
44 expected to increase by approximately 1.153 units ( $BMI = -7.797 + 1.153 (MUAC)$ ). There was a  
45 significant positive correlation between BMI and MUAC in both males and females and in rural  
46 and urban residents ( $P < 0.01$ ). The ROC curve was excellent for BMI in the overweight range  
47 ( $AUC = 0.87$ ), and the findings were superior in the obese range ( $AUC = 0.956$ ).

## 48 **Conclusion**

49 The correlation between MUAC and BMI is positive regardless of sex or rural/urban residence.  
50 Therefore, the MUAC can be used as a clinical test to predict BMI .

51

52 **Keywords:** Malnutrition, Well-being, Diagnosis, Body Mass Index, Middle Upper Arm  
53 Circumference, Non-Communicable Diseases, Malawi

54

55

56

57

58

59

60

61

## 62 **Introduction**

63 Worldwide, around 890 million adults are living with obesity, while 390 million are underweight.  
64 In sub-Saharan Africa (SSA), the overall prevalence of overweight/obesity among adults in the  
65 region was estimated to be 42% [1]. Recently, Malawi has experienced the rise of obesity and  
66 overweight [2], and literature suggests that about 21% of Malawian adult women are overweight  
67 or obese [3]. A study found that overweight and/or obesity are the most common public health  
68 issues in Malawi, impacting at least one in every five people [4]. The condition affects more  
69 women than men, and it is more prevalent in cities than in rural areas [4]. As a consequence, an  
70 increase in weight is strongly linked to a rise in waist-hip ratio, a proven risk factor for NCDs such  
71 as diabetes [5].

72 Malnutrition refers to deficiencies, excesses, or imbalances in a person's intake of energy and/or  
73 nutrients [6]. Generally, it covers 2 broad groups of conditions. One is 'undernutrition'—which  
74 includes stunting (low height for age), wasting (low weight for height), underweight (low weight  
75 for age), and micronutrient deficiencies or insufficiencies (a lack of important vitamins and  
76 minerals) [7]. The other is overweight, obesity, and diet-related non-communicable diseases  
77 (NCDs) such as heart disease, stroke, diabetes, and cancer [8]. BMI is a widely used indicator of  
78 nutritional status in adults, while the MUAC is another anthropometric measure used primarily  
79 among children. MUAC is a viable alternative to BMI for screening adult underweight. The  
80 MUAC is a measurement of the upper arm circumference at the halfway point between the elbow  
81 tip (olecranon process) and the shoulder blade tip (acromion process) [9]. While MUAC  
82 measurements are often a reflection of both muscle and subcutaneous fat, in undernourished people  
83 with lower quantities of subcutaneous fat, MUAC values can indicate a chronic energy shortage.  
84 MUAC readings are linear and may be obtained with a simple tape measure. With suitable MUAC

85 cut-offs, anybody with minimal training can perform the examination using a simple paper strip  
86 with color-coded cut-off values [9].

87 BMI and MUAC stand as pivotal anthropometric indicators utilized in assessing nutritional status.  
88 In general, BMI is widely recognized as a standard measure of adiposity and nutritional status,  
89 MUAC offers a convenient and reliable alternative, particularly in resource-constrained settings  
90 [10]. Nevertheless, the measurement of the MUAC offers a simple and sensitive method for early  
91 diagnosis of at-risk groups of both overweight and underweight [11]. According to Brito and  
92 colleagues [12], MUAC can represent a useful measurement of malnutrition, especially in the  
93 absence of weight and height measurements, which constitute BMI [13].

94 Despite the prominence of BMI and MUAC in nutritional assessment, limited comprehensive  
95 studies have explored the intricate relationship between these two metrics among populations in  
96 developing countries such as Malawi. Understanding this relationship is essential for more  
97 accurate and nuanced assessments of nutritional status, enabling targeted interventions to combat  
98 malnutrition effectively. By conducting a thorough analysis, encompassing diverse age groups,  
99 genders, and geographical locations, this study seeks to shed light on MUAC as a proxy  
100 measurement for BMI in the Malawian context. There is an urgent need to establish population-  
101 based information on MUAC and BMI to ensure effective screening in low-resource areas such as  
102 outreach or field clinical investigations where time and resources, including literacy and numeracy  
103 skills, are involved to a certain extent [14]. This approach necessitates considerable training and  
104 the use of calibrated medical weighing scales and stadiometers [15].

105 By unraveling these mysteries, we hope to provide valuable insights into the nutritional landscape  
106 of Malawi and inform evidence-based policies and interventions aimed at improving nutritional  
107 outcomes and overall population health. In addition, through statistical analysis, and interpretation,

108 this study endeavors to contribute to the growing body of literature on nutritional assessment  
109 methodologies while offering practical implications for public health practitioners, policymakers,  
110 and researchers working in the field of nutrition and health in Malawi and beyond. Therefore, this  
111 study aimed to comprehensively examine the relationship between BMI and MUAC among  
112 Malawians across sex and rural-urban residence strata.

## 113 **Materials and Methods**

### 114 **Study design and setting**

115 The cross-sectional quantitative study adopted a secondary research technique. Data for the study  
116 was retrieved from a survey conducted by MEIRU between May 2013 and April 2017. The  
117 original data was collected from two sites in Malawi, namely Karonga in the Northern Region of  
118 Malawi and Area 25 in Lilongwe, the Central Region of Malawi. Lilongwe is the capital city and  
119 the largest city in the country [16]. Area 25 represents an economically mixed urban economy  
120 with a population of about 66,000 people, and Karonga is a lakeshore area with a subsistence  
121 economy and a rural area [17]. The data utilized questionnaires administered through an  
122 electronic platform. Some data was obtained from laboratory results.

### 123 **Inclusion and exclusion criteria**

124 The study included all adults aged 18 and above who resided in the house and excluded all adults  
125 who identified as visitors.

## 126 **Sampling procedure**

127 The study population and sampling frame are described in a previous study [18]. The study  
128 population was made up of people who took part in the Malawi Epidemiology and Intervention  
129 Research Unit Noncommunicable Disease Survey, which was conducted between 2013 and 2017.  
130 The study focused on residents from various regions of Malawi, to determine the prevalence and  
131 risk factors for noncommunicable diseases. The sampling frame was developed to ensure a  
132 representative sample of the population by considering a varied range of demographic and  
133 geographical criteria.

## 134 **Data Management**

135 BMI was recoded into categorical variables, classifying the participants into 4 categories based  
136 on BMI measurements. The subject's BMI determines their classification as underweight (BMI <  
137 18.5 kg/m<sup>2</sup>), within the normal range (BMI = 18.5 to 24.9 kg/m<sup>2</sup>), overweight (BMI > 24.9 to  
138 29.9 kg/m<sup>2</sup>), or obese (BMI ≥ 30 kg/m<sup>2</sup>) [12].

## 139 **Data Analysis**

140 The data were analyzed using IBM Statistical Package for Social Sciences (SPSS) Statistics  
141 version 27. Descriptive statistics were generated for demographic variables, all measurements  
142 (weight, height, and MUAC), and BMI. A curve estimation was done to assess the linearity of  
143 BMI and MUAC. Subsequently, a correlation analysis between BMI and MUAC was performed.  
144 Pearson correlation was used to assess the correlation between variables. Furthermore, linear  
145 regression analysis was conducted to predict BMI values from MUAC. The ROC curve was used  
146 to set cutoff values, with the optimal area being less than 0.1-0.9. Accordingly, AUC ranges from

147 greater than 0.9 depict excellent model discrimination [19]. Results with a p-value of  $< 0.05$  were  
148 considered statistically significant.

### 149 **Ethical consideration**

150 Due to the nature of the study, we did not require an ethical review since the data used is freely  
151 available online upon request. However, the initial study was ethically approved (Ref number: IRB  
152 No. 13/2012) and adhered to the Declaration of Helsinki.

### 153 **Results**

154 The study assessed 30575 participants, of whom the majority (61.8%) were females (Table 1). The  
155 majority of participants were from urban areas (54.5%). Most of the participants were aged 15–  
156 34 years (18263) (59.7%) and the least number of participants were aged 55–64 (3588) (11.7%)  
157 (Figure 1)

158  
159 **Table 1. Demographic characteristics of study participants**

| <b>Gender</b>   | <b>Number</b> | <b>Percentage (%)</b> |
|-----------------|---------------|-----------------------|
| Male            | 11668         | 38.2                  |
| Female          | 18907         | 61.8                  |
| <b>Location</b> |               |                       |
| Urban           | 16672         | 54.5                  |
| Rural           | 13903         | 45.4                  |

160



161 Based on BMI, most participants were within the normal range, 20674 (67.6%), and the least  
162 number of participants were underweight, 1757 (5.7%). Based on gender, more males were  
163 underweight compared to females. And those in rural areas had a higher prevalence of underweight  
164 than those in urban areas. However, considering overweight and obesity, the prevalence was higher  
165 among females and those in urban areas (Table 2).

166 **Table 2. Interpretation of Weight Based on Body Mass Index according to gender and**  
167 **rurality**

|                    | <b>TOTAL</b> | <b>Male</b> | <b>Female</b> | <b>Rural</b> | <b>Urban</b> |
|--------------------|--------------|-------------|---------------|--------------|--------------|
| <b>Underweight</b> | 1757 (5.7)   | 897(7.6)    | 860 (4.5)     | 1009 (7.3)   | 748 (4.5)    |
| <b>Normal</b>      | 20674 (67.6) | 9176 (78.6) | 11498 (60.8)  | 10354 (74.5) | 10320 (61.9) |
| <b>Overweight</b>  | 5442 (17.8)  | 1312 (11.2) | 4130 (21.8)   | 1909 (13.7)  | 3533 (21.2)  |
| <b>Obese</b>       | 2702 (8.8)   | 283 (2.4)   | 2419 (12.8)   | 631(4.5)     | 2071(12.4)   |

168

169

170 **Figure 1. Distribution of study participants according to age**

171 **Distribution of MUAC and BMI according to gender**

172

173 The mean BMI score was 23.5 kg/m<sup>2</sup> (SD = 4.55). According to gender, males 21.99 kg/m<sup>2</sup> (SD  
174 = 3.20) participants had a lower BMI compared to females 24.54 kg/m<sup>2</sup> (SD = 5.001). An

175 independent t-test found that the difference in mean BMI-based rurality was statistically significant  
176 ( $t(29448) = -48.765, p < 0.001$ ).

177 The mean MUAC was 27.2 cm (SD = 3.300). According to gender, males had a lower MUAC of  
178 26.45 cm (SD = 2.682) than females at 27.60 cm (SD = 3.55). An independent t-test found that the  
179 difference in mean MUAC-based rurality was statistically significant ( $t(30573) = -30.128, p$   
180  $< 0.001$ ).

### 181 **Distribution of MUAC and BMI according to location**

182 According to location, the average BMI was higher in Lilongwe at 24.33 kg/m<sup>2</sup> (SD = 4.96) than  
183 in Karonga at 22.57 kg/m<sup>2</sup> (SD = 3.788). An independent t-test found that the difference in mean  
184 BMI-based rurality was statistically significant ( $t(29448) = 33.677, p < 0.001$ ). Likewise, MUAC  
185 was higher in Lilongwe at 27.69 cm (SD = 3.39) than in Karonga at 26.52 cm (SD = 3.07). An  
186 independent t-test found that the difference in mean MUAC-based rurality was statistically  
187 significant ( $t(30573) = 31.33, p < 0.001$ ).

### 188 **Relationship between MUAC and BMI**

189 The Pearson correlation test indicated a statistically significant correlation between MUAC and  
190 BMI ( $r = 0.836, CI = 0.832-0.839$ ) (figure 2) A simple linear regression was used to estimate body  
191 BMI from MUAC. A significant regression equation was found ( $F(1, n-2) = 68334, p < 0.001$ ),  
192 with a R<sup>2</sup> of 0.699. This means that MUAC can explain approximately 69.9% of the variation in  
193 BMI. When MUAC is measured in centimeters, the projected BMI of the individuals is  $-7.797 +$   
194  $1.153$  (MUAC). BMI increased by 1.153 per centimeter of MUAC. MUAC was a strong predictor  
195 of BMI ( $r = 0.836, p < 0.001$ ).

196

197

198 Figure 2. Correlation between BMI and MUAC

199 **Relationship between MUAC and BMI according to sex**

200 The Pearson correlation coefficient test showed that there was a positive correlation between BMI  
201 and MUAC among male participants, and the correlation was statistically significant ( $r = 0.759$ ,  
202  $p < 0.001$  (CI = 0.751, 0.766).

203

204 Figure 3. Correlation between BMI and MUAC among males

205

206 As shown in Figure 4 below, the Pearson correlation test showed that there is a statistically  
207 significant positive correlation between BMI and MUAC among females ( $r = 0.857$ ,  $p < 0.001$ , CI  
208 = 0.853, 0.861).

209 Figure 4. Correlation between BMI and MUAC among female

210 **Relationship between MUAC and BMI according to rurality**

211

212 The Pearson chi-square showed a positive correlation that was statistically significant ( $r = 0.820$ ,  
213  $p < 0.001$ ), as shown in Figure 5.

214

215 Figure 5. Correlation between BMI and MUAC among urban settlers

216

217 According to Figure 6 below, the Pearson correlation coefficient test showed that the relationship  
218 between MUAC and BMI among rural settlers was positive and statistically significant ( $r = 0.856$ ,  
219  $p < 0.001$ ).

220

221 Figure 6. Correlation between BMI and MUAC among rural settlers

### 222 **Determining MUAC cut-off points**

223 The area under the ROC curve for underweight (Figure 7) and normal weight (Figure 8) was 0.076  
224 and 0.232, respectively. Nevertheless, the ROC curve was excellent for BMI in the overweight  
225 range ( $AUC = 0.87$ ), and the findings were superior in the obese range ( $AUC = 0.956$ ).

226

227

228

229

230

231

232

233 Figure 7. ROC Curve for Underweight

234

235

236

237

238 Figure 8 ROC of Normal

239 Figure 9. ROC OF OVERWEIGHT

240 Figure 10. ROC Curve for Obesity

## 241 **Discussion**

242 The study aimed to assess the relationship between MUAC and BMI among the Malawian  
243 population. In the current paper, MUAC and BMI were strongly correlated, and the correlation  
244 was statistically significant, confirming that MUAC can be used as an alternative to BMI  
245 measurement among this population group.

246 The study reports a positive correlation between BMI and MUAC similar to a study conducted  
247 among university students in Pakistan [20], a study conducted among students in South Africa  
248 [21], and other studies conducted in Sudan [22] and elsewhere [23, 24]. Furthermore, this study  
249 finding is similar to Brito and colleagues [12], who found a statistically positive correlation  
250 between MUAC and BMI among inpatients. The study findings add to the existing literature that  
251 suggests a positive relationship between MUAC and BMI. In particular, this study is the first one  
252 conducted among this population group. The findings of this study highlight the fact that MUAC  
253 can be used to detect underweight, overweight, and obesity among the study population.  
254 Developing countries such as Malawi are currently facing the double burden of NCD, with a rise  
255 in overweight and obesity [25]. This study's findings, if incorporated into practice, provide a simple  
256 and efficient method of screening suitable for outreach programs, including bedridden patients.  
257 Furthermore, this finding is critical in the context of task-shifting policies that allow less  
258 specialized cadres, such as community health workers and hospital attendants, in hard-to-reach  
259 areas to conduct malnutrition status checks. Task-shifting approaches have been proven to be an  
260 efficient health management technique in light of the shortage of healthcare workers [26].

261

262 The study found that for each additional centimeter increase in MUAC, BMI is expected to  
263 increase by approximately 1.153 units. This finding can be particularly useful in clinical settings  
264 where MUAC can be used as a quick and reliable measure to estimate BMI and assess nutritional  
265 status. In Africa, two-thirds of patients are at risk of developing malnutrition issues [27].  
266 Similarly, Malawi reports high rates of malnutrition, calling for comprehensive screening practices  
267 [27].

268 Determining the MUAC cut-off point from the ROC curve was not significant in people with  
269 underweight or normal weight, but it was significant in the overweight and obese range, similar to  
270 a previous study [28]. In contrast, others [29] found that MUAC was a good predictor for  
271 underweight. The difference in results can be attributed to variations in geographical areas and  
272 study populations. The study recommends implementing MUAC cut-off values based on regional  
273 data, conducting validation studies, and integrating them into national health protocols. These  
274 measures aim to improve nutritional assessments, reduce health disparities, and strengthen health  
275 systems.

276 Although both genders reported positive correlations, females demonstrated a stronger correlation  
277 compared to men, similar to previous authors [11]. This study's finding reflects gender differences  
278 in the parameters due to genetic and biological factors such as the effect of sex hormones [30].

279 Although the correlation between MUAC and BMI was positive and significant in both rural and  
280 urban areas, there was a slight difference between the two sites, which are urban and rural. This  
281 agrees with a previous paper [11], that reported stronger correlations between MUAC and BMI in  
282 Tanzania as compared to Mozambique. The study findings postulate that the relationship between  
283 MUAC and BMI may vary based on geographical location. Geographical disparities related to

284 noncommunicable diseases in rural and urban areas exist due to changes in demography and  
285 structure [30].

286 The average MUAC and BMI in this study are in tandem with previous studies [12]. Nevertheless,  
287 according to gender, females had a higher BMI and a higher MUAC. This is not surprising  
288 considering that obesity and overweight in developing countries are major problems facing adult  
289 women, unlike men [31]. In Malawi, the prevalence of obesity among women has doubled, from  
290 10% in 1992 to 21% in 2016 [2]. The findings of this study can be attributed to the fact that among  
291 Malawian women, gaining weight is strongly linked with doing well in life; hence, whenever  
292 resources allow, women strive to gain weight to attain a symbol of wealth and improve their  
293 personal dignity [32]. Although the study did not assess the factors associated with being  
294 overweight, the literature indicates that women, especially those in marriage, view being  
295 overweight as a sign of opulence and wealth, as large body size is viewed in light of successful  
296 marriage among women [30]. Besides behavioral factors such as physical inactivity, genetic and  
297 biological factors also play a major role for women. The findings of this study highlight the need  
298 to streamline strategies to curb overweight by considering wealth, gender, and marital status as  
299 risk factors for overweight.

300 In the study, participants in urban areas had a higher BMI than those residing in rural areas, on par  
301 with a recent study conducted in the country, which found that poverty is linked with the odds of  
302 being underweight [2]. Malawi is a country currently going through rapid urbanization [33].  
303 Consequently, urbanization is strongly linked to a sedentary lifestyle and easy access to unhealthy  
304 foods (high in calories and low in dietary fiber), which lead to overweight and obesity [30].  
305 Furthermore, the nutritional status of a country is strongly linked to levels of economic  
306 development, gross domestic product, and urbanization [34]. Needless to say, overweight and

307 obesity in Malawi can be explained by both individual and community factors [32]. Furthermore,  
308 one of the major contributing factors to malnutrition in Malawi is the lack of awareness regarding  
309 the dangers of gaining weight through various media outlets, including social media platforms [2].  
310 This finding can be attributed to the increased economic activities and income-generating activities  
311 associated with city life, where people may manage to use disposable income on extra food,  
312 leading to overweight. For instance, Ndambo and colleagues [32] found that Malawians who have  
313 a normal weight were those who admitted to eating less than they would like to owing to financial  
314 constraints. Another study found that the risk of overweight and obesity increases with increasing  
315 weight among the Malawian population [35]. In addition, underweight could be attributed to  
316 increased physical activities in the rural areas associated with farming activities, unlike the urban  
317 sedentary lifestyles fueled by office work and motorized transportation in the city. The findings of  
318 this study suggest efforts to combat obesity should focus on the need for regular exercise, healthy  
319 eating behaviors, and public awareness campaigns as viable management options for non-  
320 communicable diseases in urban areas.

### 321 **Limitations**

322 The study is not without limitations. Firstly, the study does not represent a nationally representative  
323 survey and hence cannot be generalized to a wider Malawian context considering that only  
324 segments of two districts were covered in the analysis. Secondly, the study does not represent all  
325 age groups, especially children. There was also a lack of data regarding morbidities such as  
326 HIV/AIDS and tuberculosis. In addition, the study did not classify the four categories of nutrition  
327 status based on MUAC, as it is beyond the scope of the study. Nevertheless, this study is the first  
328 to be conducted on the topic among the population group.



329 **Conclusion**

330 In conclusion, this study contributes to the literature on adult nutrition in a resource-limited setting.  
331 Given that the study found that the correlation between MUAC and BMI is strong and positive  
332 regardless of gender and rural/urban residence, the study recommends that MUAC can be used as  
333 a simple and low-resource nutrition screening tool among this population. Hence, the study  
334 findings contribute to the fight against NCDs in the country by promoting early diagnosis and  
335 management of NCDs in Malawi. It recommends training and education on MUAC among low-  
336 level cadres to increase coverage of NCD screening in rural and urban areas. More studies are  
337 required to further understand this phenomenon, targeting various high-risk population groups  
338 such as children, pregnant women, and people living with HIV/AIDS. In addition, a nationwide  
339 study is needed to elucidate the concept beyond two areas.

340 **Declarations**

341 **Acknowledgments**

342 None

343 **Funding**

344 None

345 **Conflict of interest**

346 The authors declare that they do not have any conflict of interest about this study

347 **Data availability**

348 The data utilized for this study is freely accessible online and can be accessed via the following

349 link <https://doi.org/10.17037/DATA.00000961>

350 **Informed consent**

351 Not applicable

352 **Ethical approval**

353 Due to the nature of our research work, the ethical approval was waived.

354

355

356

357

358

359

360

361

362

363 **References**

- 364 1. Dabou S. Malnutrition Remains a Big Problem in Sub-Saharan Africa. African Liberty.  
365 2024 Apr 9 [cited 2024 May 23]. Available from:  
366 <https://www.africanliberty.org/2024/04/09/malnutrition-remains-a-big-problem-in-sub-saharan->  
367 [africa/](https://www.africanliberty.org/2024/04/09/malnutrition-remains-a-big-problem-in-sub-saharan-africa/)
- 368 2. Ntenda, P. A. M., & Kazambwe, J. F. (2019). A multilevel analysis of overweight and  
369 obesity among non-pregnant women of reproductive age in Malawi: evidence from the 2015–16  
370 Malawi Demographic and Health Survey. *International health*, 11(6), 496-506.
- 371 3. Nkoka O, Ntenda PAM, Senghore T, Bass P. Maternal overweight and obesity and the  
372 risk of caesarean birth in Malawi. *Reprod Health*. 2019;16:1-10.
- 373 4. Msyamboza KP, Kathyola D, Dzowela T. Anthropometric measurements and prevalence  
374 of underweight, overweight, and obesity in adult Malawians: nationwide population based NCD  
375 STEPS survey. *Pan Afr Med J*. 2013;15(1).
- 376 5. Després, J. P. "Body fat distribution and risk of cardiovascular disease: an update."  
377 *Circulation*, 2012, 126(10), 1301-1313.  
378 <https://doi.org/10.1161/CIRCULATIONAHA.111.067264>
- 379 6. Elia M. Defining, Recognizing, and Reporting Malnutrition. *Int J Low Extrem Wounds*.  
380 2017. Available from: <https://doi.org/10.1177/1534734617733902>
- 381 7. Amadu I, Seidu AA, Duku E, Frimpong JB, Jnr JEH, Aboagye RG, et al. Risk factors  
382 associated with the coexistence of stunting, underweight, and wasting in children under 5 from  
383 31 sub-Saharan African countries. *BMJ Open*. 2021;11(12):e052267.
- 384 8. Onyango AW, Nikiema L, Kimokoti RW. Nutrition in health promotion policies and  
385 programs at the community level. *Handbook of Global Health*. 2021;2063-2098.

- 386 9. Tang AM, Chung M, Dong KR, et al. Determining a global mid-upper arm circumference  
387 cut-off to assess underweight in adults (men and non-pregnant women). *Public Health Nutr.*  
388 2020;23(17):3104-3113. Available from: <https://doi.org/10.1017/S1368980020000397>
- 389 10. Das P, Khatun A, Bose K, Chakraborty R. The validity of mid-upper arm circumference  
390 as an indicator of low BMI in population screening for undernutrition: a study among adult slum  
391 dwellers in eastern India. *Public health nutrition.* 2018 Oct;21(14):2575-83.
- 392 11. Eleraky L, Issa R, Maciel S, Mbwana H, Rybak C, Frank J, et al. High Prevalence of  
393 Overweight and Its Association with Mid-Upper Arm Circumference among Female and Male  
394 Farmers in Tanzania and Mozambique. *Int J Environ Res Public Health.* 2020;18(17):9128.  
395 Available from: <https://doi.org/10.3390/ijerph18179128>
- 396 12. Brito NB, Suárez Llanos JP, Ferrer MF, Oliva García JG, Brito ID, Pereyra-García Castro  
397 F, et al. Relationship between Mid-Upper Arm Circumference and Body Mass Index in  
398 Inpatients. *PLOS ONE.* 2016;11(8):e0160480. Available from:  
399 <https://doi.org/10.1371/journal.pone.0160480>
- 400 13. Lillie M, Lema I, Kaaya S, et al. Nutritional status among young adolescents attending  
401 primary school in Tanzania: contributions of mid-upper arm circumference (MUAC) for  
402 adolescent assessment. *BMC Public Health.* 2019;19:1582. Available from:  
403 <https://doi.org/10.1186/s12889-019-7897-4>
- 404 14. Da Silva HV, Santos SO, Silva NO, Ribeiro FD, Josua LL, Moreira AS. Nutritional  
405 assessment associated with length of inpatients' hospital stay. *Nutricion hospitalaria.*  
406 2012;27(2):542-7.
- 407 15. Salih Y, Omar SM, AlHabardi N, Adam I. The Mid-Upper Arm Circumference as a  
408 Substitute for Body Mass Index in the Assessment of Nutritional Status among Pregnant

- 409 Women: A Cross-Sectional Study. *Medicina*. 2023;59(6):1001. Available from:  
410 <https://doi.org/10.3390/medicina59061001>
- 411 16. Msyamboza KP, Kathyola D, Dzowela T. Anthropometric measurements and prevalence  
412 of underweight, overweight, and obesity in adult Malawians: nationwide population based NCD  
413 STEPS survey. *Pan Afr Med J*. 2013;15(1).
- 414 17. Westgate K, Ridgway C, Rennie K, Strain T, Wijndaele K, Brage S. Feasibility of  
415 incorporating objective measures of physical activity in the STEPS program. A pilot study in  
416 Malawi. 2020.
- 417 18. Nakanga WP, Prynne JE, Banda L, Kalyesubula R, Tomlinson LA, Nyirenda M, Crampin  
418 AC. Prevalence of impaired renal function among rural and urban.
- 419 19. Shallcross NJ, Ahner DK. Predictive models of world conflict: accounting for regional  
420 and conflict-state differences. *The Journal of Defense Modeling and Simulation*. 2020  
421 Jul;17(3):243-67.
- 422 20. Laghari ZA, Baig NM, Memon F, Panhwar F, Qambarani MR, Palh ZA. Correlation of  
423 BMI and MUAC with anemia among Sindh University Students, Jamshoro, Pakistan. *Sindh  
424 Univ Res J (Sci Ser)*. 2017;49(3):553-556.
- 425 21. Otitoola O, Oldewage-Theron W, Egal A. Prevalence of overweight and obesity among  
426 selected schoolchildren and adolescents in Cofimvaba, South Africa. *S Afr J Clin Nutr*.  
427 2021;34(3):97-102.
- 428 22. Musa IR, Omar SM, Adam I. Mid-upper arm circumference as a substitute for body mass  
429 index in the assessment of nutritional status among adults in eastern Sudan. *BMC Public Health*.  
430 2022;22(1):2056.

- 431 23. Fakier A, Petro G, Fawcus S. Mid upper arm circumference: a surrogate for body mass  
432 index in pregnant women? *S Afr Med J*. 2017;107(7):606-610.
- 433 24. Tonder EV, Mace L, Steenkamp L, et al. Mid upper arm circumference (MUAC) as a  
434 feasible tool in detecting adult malnutrition. *S Afr J Clin Nutr*. 2018:1-6. Available from:  
435 <https://doi.org/10.1080/16070658.2018.1484622>
- 436 25. Gowshall M, Taylor-Robinson SD. The increasing prevalence of non-communicable  
437 diseases in low-middle income countries: the view from Malawi. *Int J Gen Med*. 2018;255-264.
- 438 26. Firoz T, Sanghvi H, Merialdi M, von Dadelszen P. Pre-eclampsia in low and middle  
439 income countries. *Best Pract Res Clin Obstet Gynaecol*. 2011;25(4):537-548.
- 440 27. Chimera-Khombe B, Barcus G, Schaffner A, Papathakis P. High prevalence, low  
441 identification and screening tools of hospital malnutrition in critically-ill patients in Malawi. *Eur*  
442 *J Clin Nutr*. 2022;76(8):1158-1164. Available from: <https://doi.org/10.1038/s41430-022-01087-5>
- 443 28. Asif M, Aslam M, Altaf S. Use of Mid-Upper Arm Circumference in Evaluation of  
444 Overweight and Obesity in the Pakistani Children and Adolescent, Aged 12-18 Years. *Pak*  
445 *Pediatr J*. 2018;42(1):42-7.
- 446 29. Thorup L, Hamann SA, Kallestrup P, Hjortdal VE, Tripathi A, Neupane D, et al. Mid-  
447 upper arm circumference as an indicator of underweight in adults: a cross-sectional study from  
448 Nepal. *BMC Public Health*. 2020;20(1):1187. Available from: [https://doi.org/10.1186/s12889-](https://doi.org/10.1186/s12889-020-09294-0)  
449 [020-09294-0](https://doi.org/10.1186/s12889-020-09294-0)
- 450 30. Samadoulougou S, Diallo M, Cissé K, Ngwasiri C, Aminde LN, Kirakoya-  
451 Samadoulogou F. High Urban-Rural Inequities of Abdominal Obesity in Malawi: Insights from  
452 the 2009 and 2017 Malawi Noncommunicable Disease Risk Factors Surveys. *Int J Environ Res*  
453 *Public Health*. 2022;19(19). Available from: <https://doi.org/10.3390/ijerph191911863>

- 454 31. Eleraky L, Issa R, Maciel S, Mbwana H, Rybak C, Frank J, Stuetz W. High prevalence of  
455 overweight and its association with mid-upper arm circumference among female and male  
456 farmers in Tanzania and Mozambique. *International Journal of Environmental Research and*  
457 *Public Health*. 2021 Aug 30;18(17):9128.
- 458 32. Ndambo MK, Nyondo-Mipando AL, Thakwalakwa C. Eating behaviors, attitudes, and  
459 beliefs that contribute to overweight and obesity among women in Lilongwe City, Malawi: a  
460 qualitative study. *BMC Women's Health*. 2022 Jun 9;22(1):216.
- 461 33. Afolabi RF, Palamuleni ME. Multilevel analysis of unhealthy bodyweight among women  
462 in Malawi: Does urbanisation matter? *PLOS ONE*. 2021;16(3):e0249289. Available from:  
463 <https://doi.org/10.1371/journal.pone.0249289>
- 464 34. Mbogori T, Kimmel K, Zhang M, Kandiah J, Wang Y. Nutrition transition and the  
465 double burden of malnutrition in Africa: A case study of four selected countries with different  
466 social economic development. *AIMS Public Health*. 2020;7(3):425-439. Available from:  
467 <https://doi.org/10.3934/publichealth.2020035>
- 468 35. Price AJ, Crampin AC, Amberbir A, Kayuni-Chihana N, Musicha C, Tafatatha T, et al.  
469 Prevalence of obesity, hypertension, and diabetes, and cascade of care in sub-Saharan Africa: a  
470 cross-sectional, population-based study in rural and urban Malawi. *Lancet Diabetes Endocrinol*.  
471 2018;6(3):208-222.
- 472

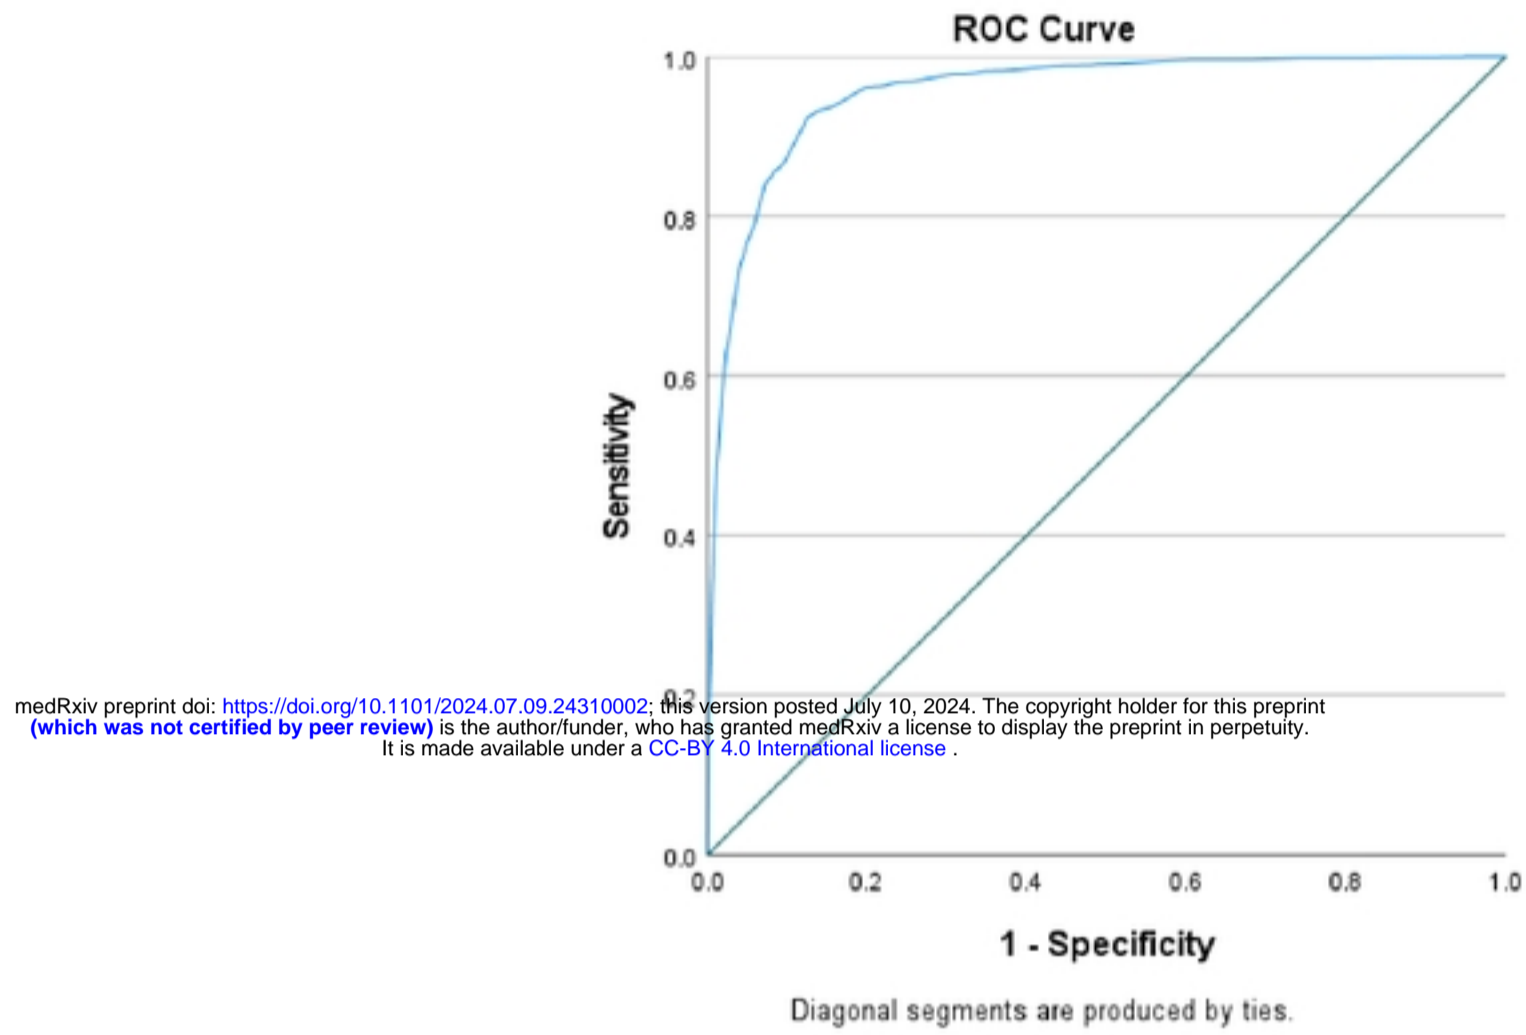

Figure 10



medRxiv preprint doi: <https://doi.org/10.1101/2024.07.09.24310002>; this version posted July 10, 2024. The copyright holder for this preprint (which was not certified by peer review) is the author/funder, who has granted medRxiv a license to display the preprint in perpetuity. It is made available under a [CC-BY 4.0 International license](#).

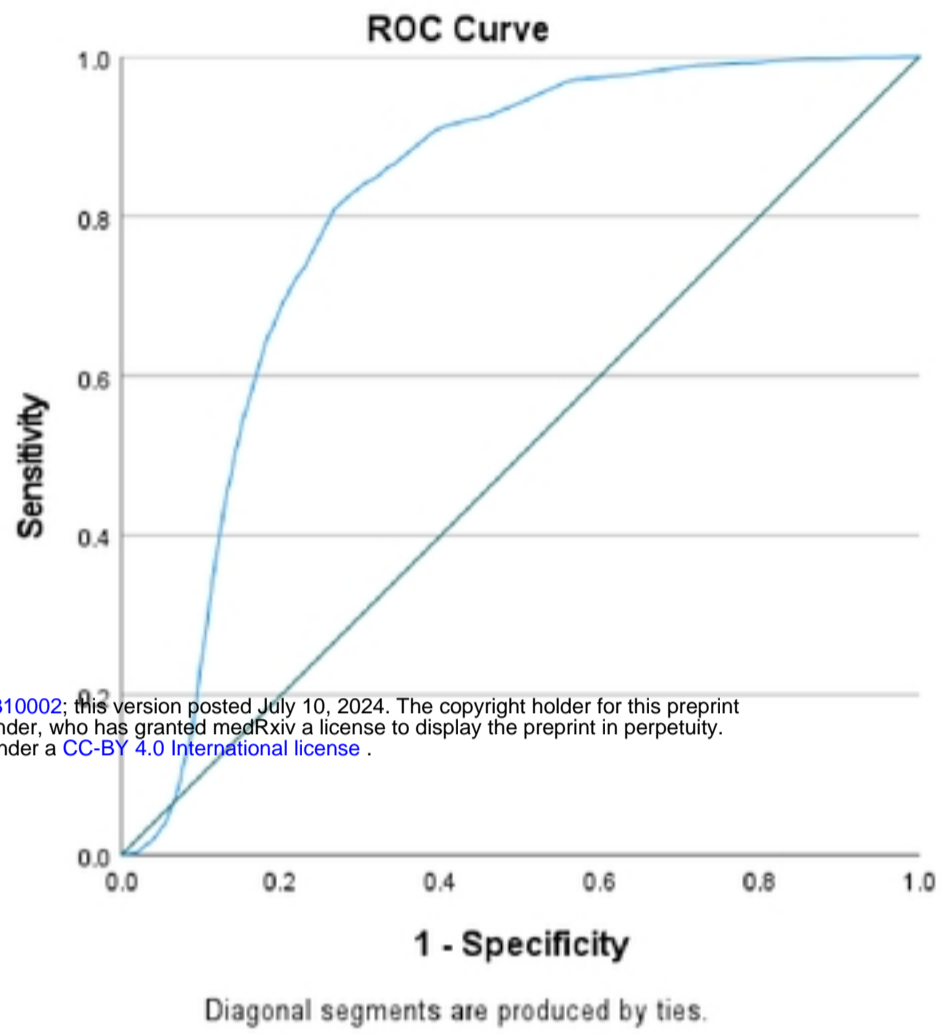

Figure 9

medRxiv preprint doi: <https://doi.org/10.1101/2024.07.09.24310002>; this version posted July 10, 2024. The copyright holder for this preprint (which was not certified by peer review) is the author/funder, who has granted medRxiv a license to display the preprint in perpetuity. It is made available under a [CC-BY 4.0 International license](#).

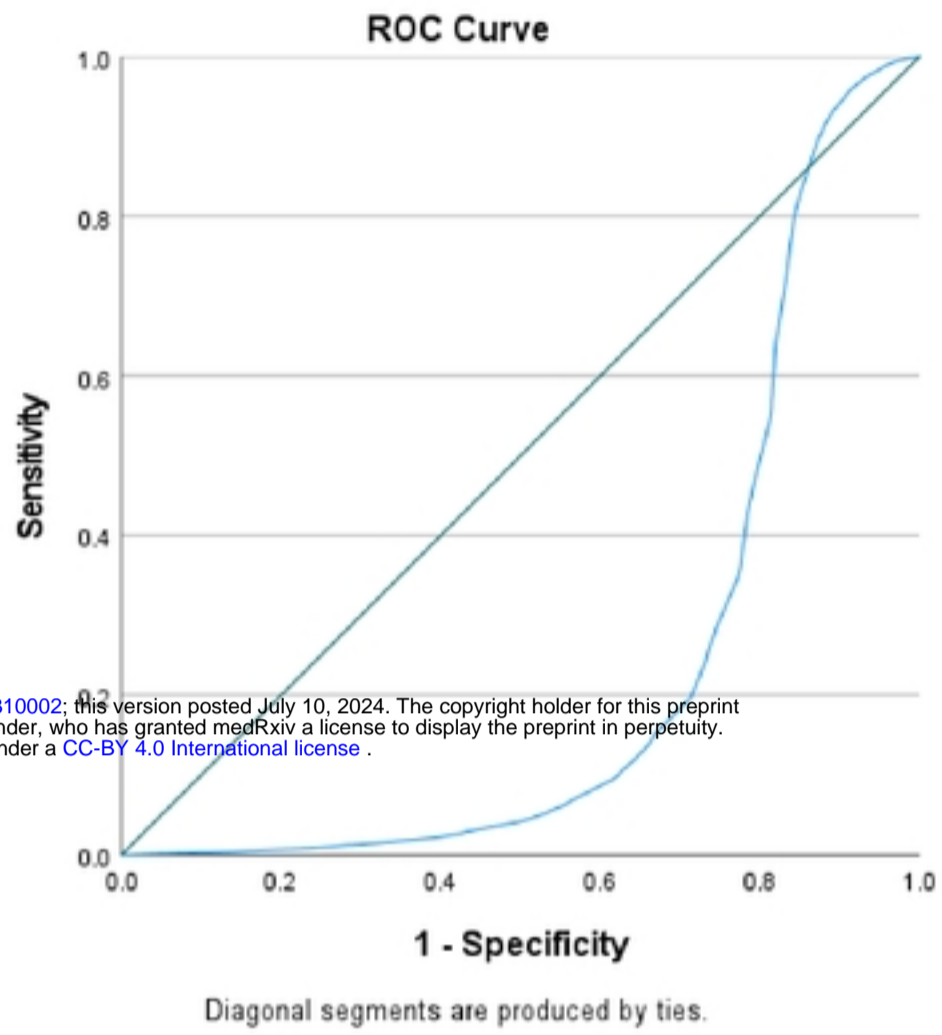

Figure 8

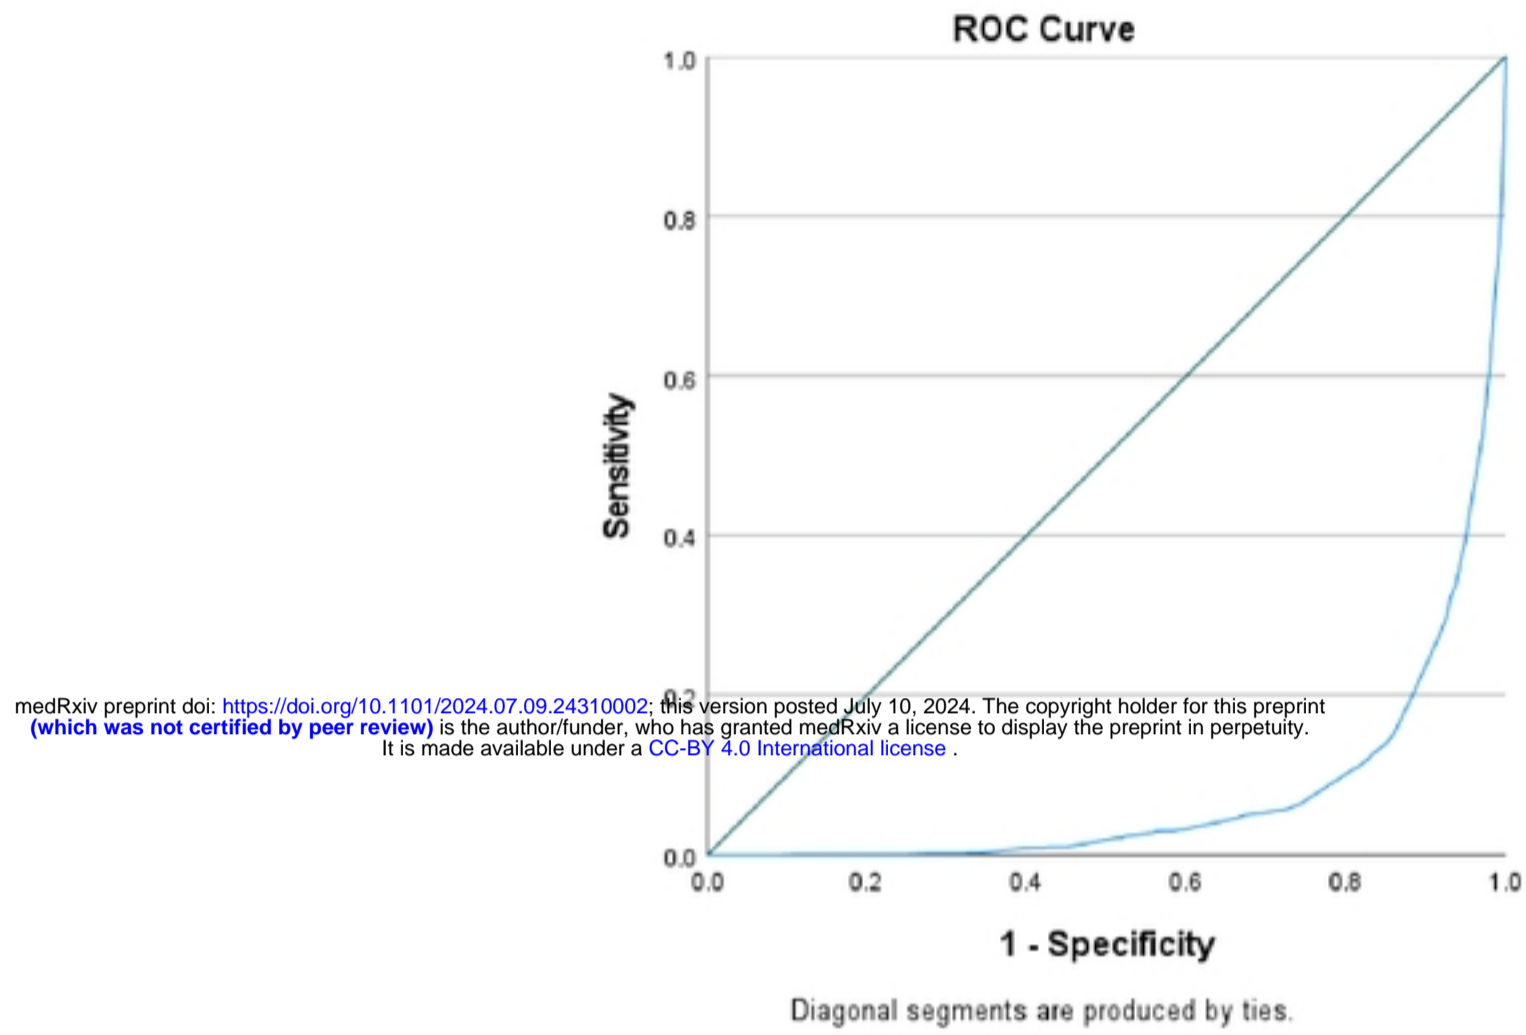

Figure 7

## Correlation between BMI and MUAC among rural settlers

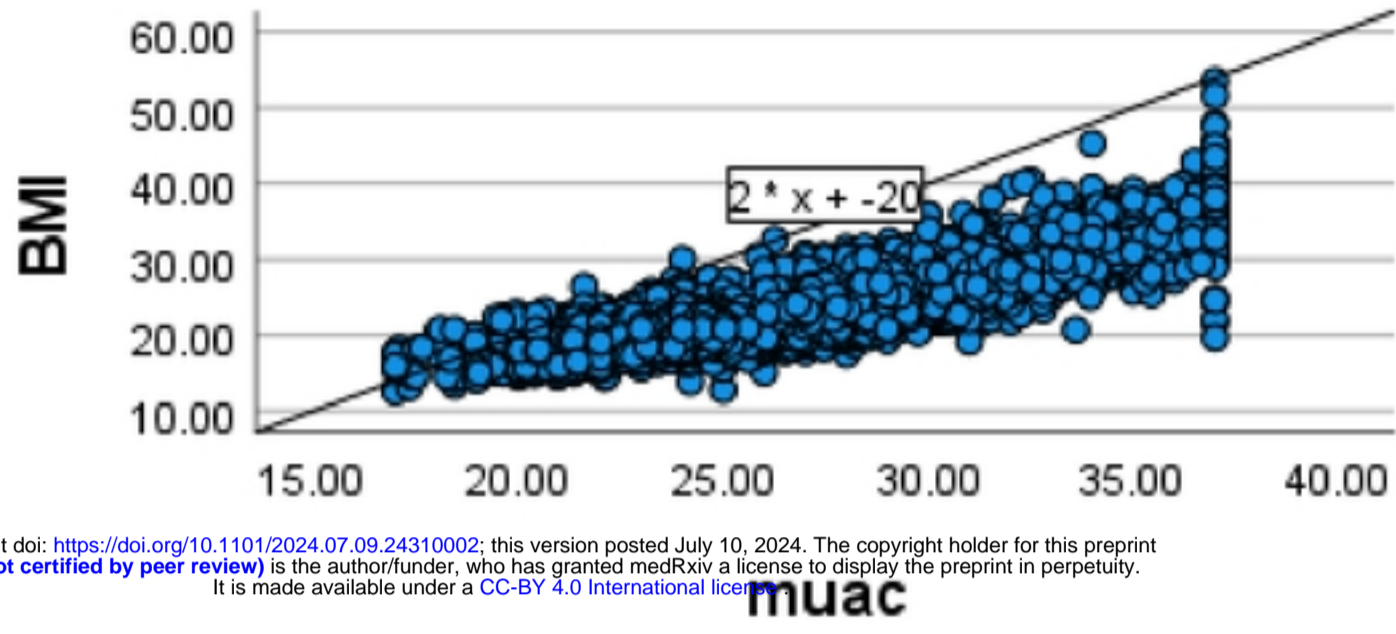

medRxiv preprint doi: <https://doi.org/10.1101/2024.07.09.24310002>; this version posted July 10, 2024. The copyright holder for this preprint (which was not certified by peer review) is the author/funder, who has granted medRxiv a license to display the preprint in perpetuity. It is made available under a [CC-BY 4.0 International license](#).

### Correlation between BMI and MUAC among urban settlers

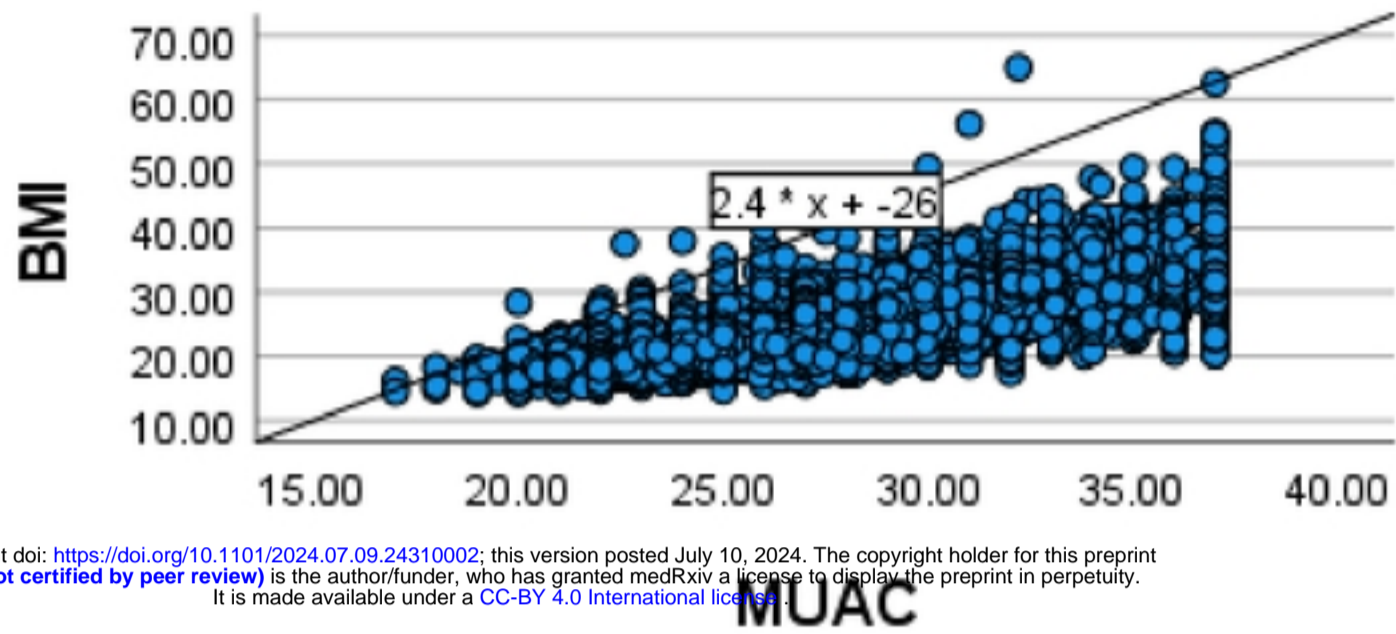

medRxiv preprint doi: <https://doi.org/10.1101/2024.07.09.24310002>; this version posted July 10, 2024. The copyright holder for this preprint (which was not certified by peer review) is the author/funder, who has granted medRxiv a license to display the preprint in perpetuity. It is made available under a [CC-BY 4.0 International license](https://creativecommons.org/licenses/by/4.0/).

Figure 5

## Correlation between BMI and MUAC among Females

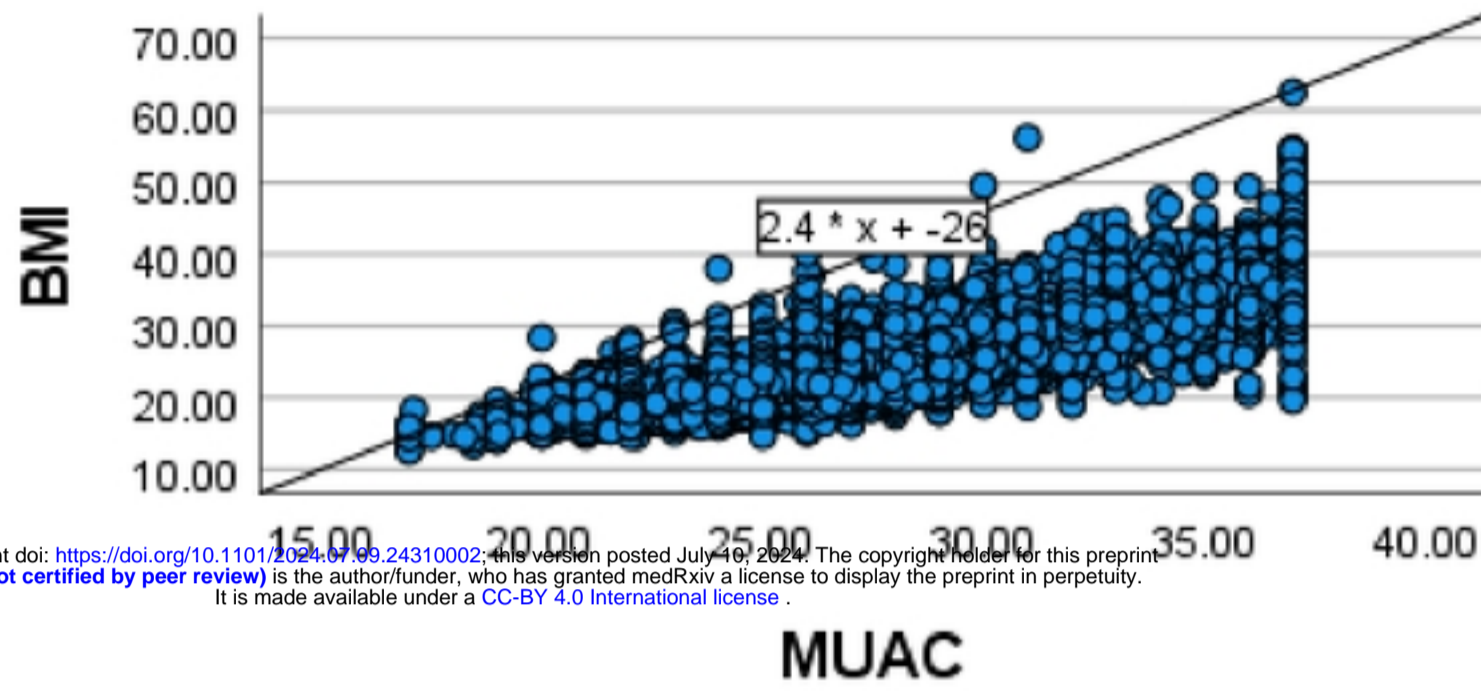

medRxiv preprint doi: <https://doi.org/10.1101/2024.07.09.24310002>; this version posted July 10, 2024. The copyright holder for this preprint (which was not certified by peer review) is the author/funder, who has granted medRxiv a license to display the preprint in perpetuity. It is made available under a [CC-BY 4.0 International license](https://creativecommons.org/licenses/by/4.0/).

### Correlation between BMI and MUAC among Males

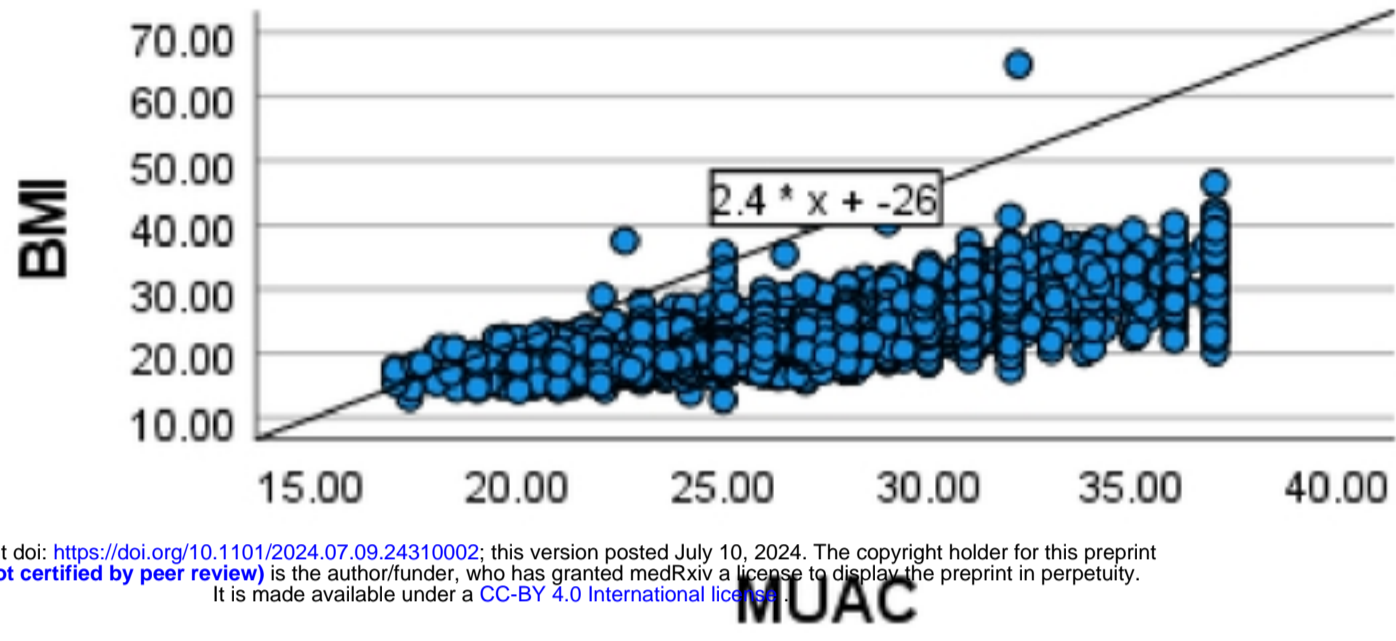

medRxiv preprint doi: <https://doi.org/10.1101/2024.07.09.24310002>; this version posted July 10, 2024. The copyright holder for this preprint (which was not certified by peer review) is the author/funder, who has granted medRxiv a license to display the preprint in perpetuity. It is made available under a [CC-BY 4.0 International license](https://creativecommons.org/licenses/by/4.0/).

Figure 3

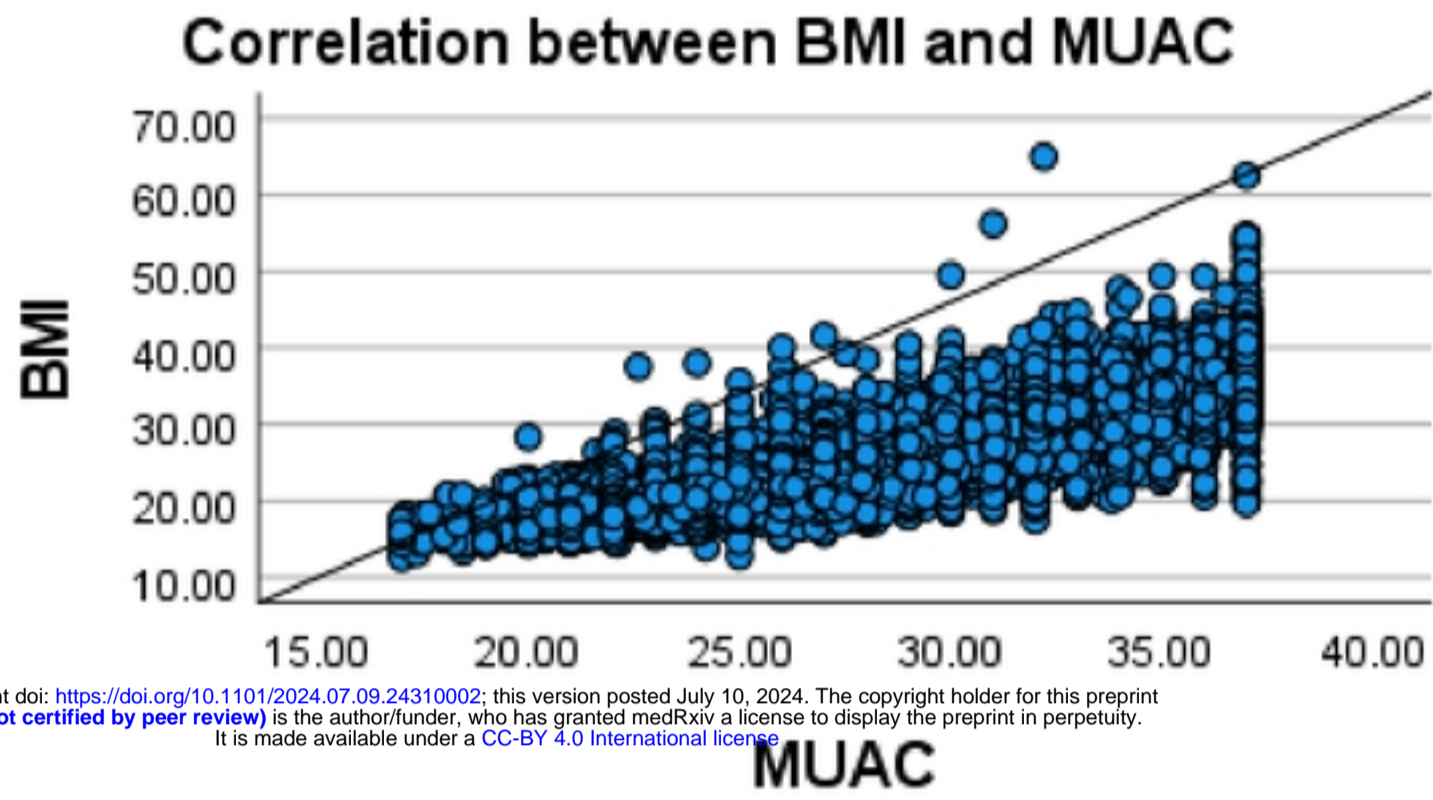

Figure 2



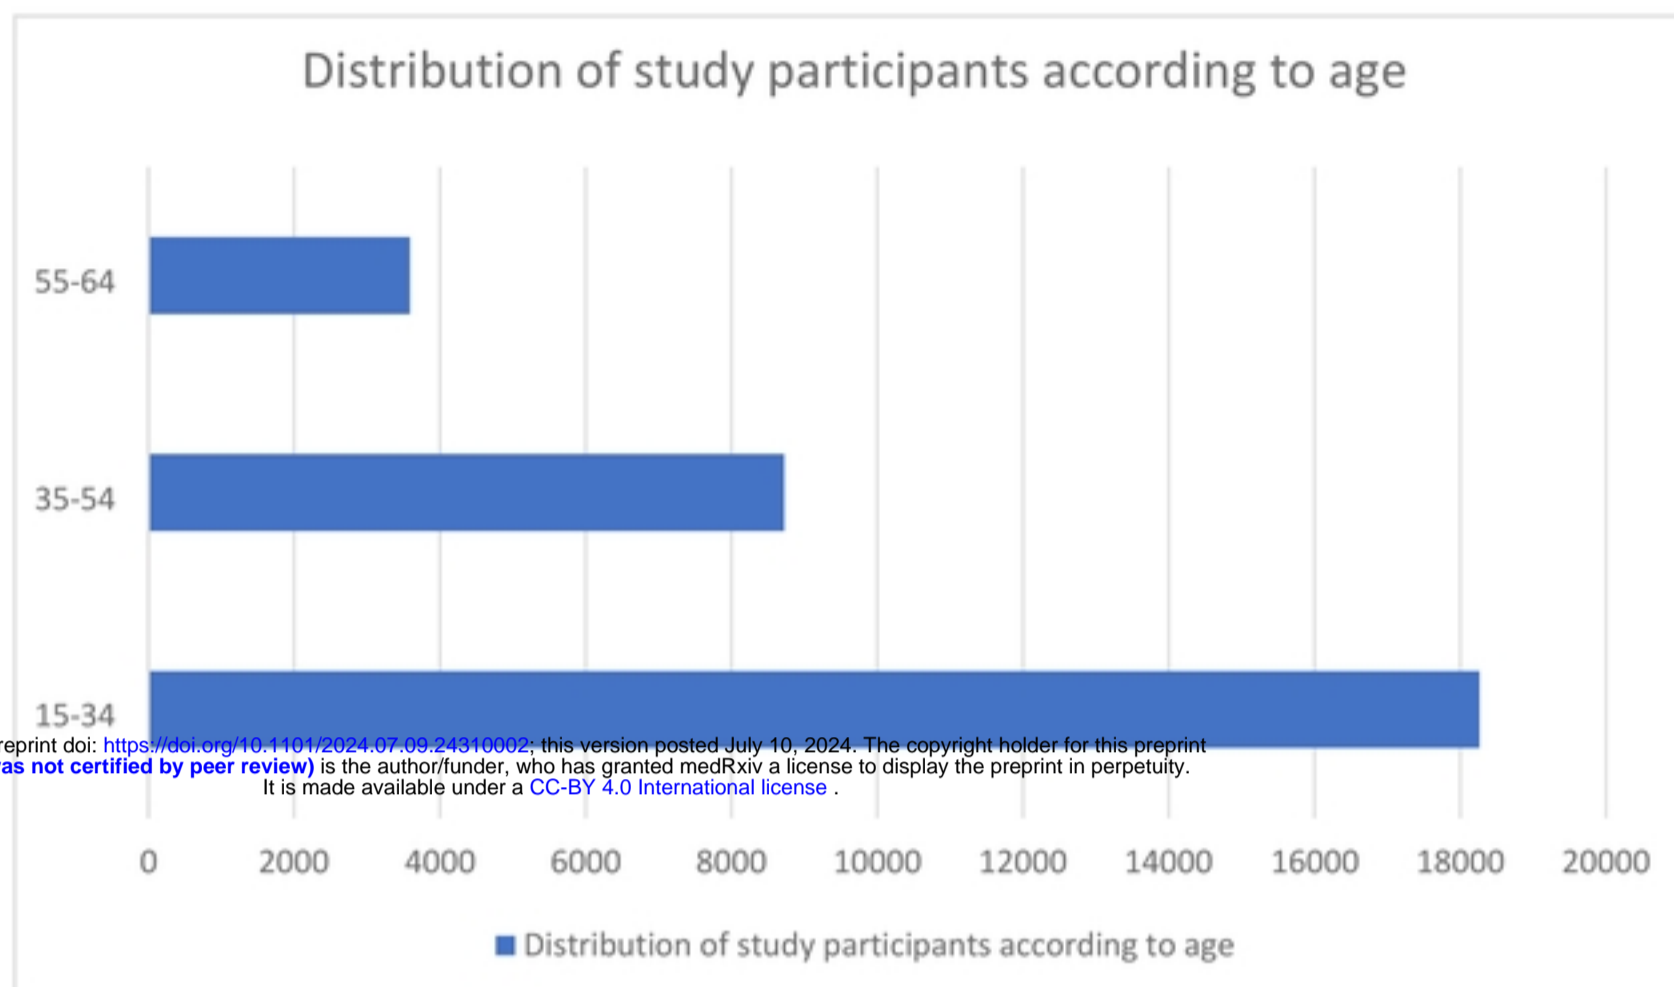

Figure 1
